# Supplementary material
Source: Springer Nature journal article supplement (https://www.springermedizin.de/resource/supplementary/12874_2014_1075_MOESM2_ESM.pdf/9433486)
Supplement: MOESM2 [file 9433486]

**1699 Employees**  
according to payroll

**625 not eligible**

**1074 Eligible employees**

**309**  
Non-responders

**765 Responders**  
(614 consenters, 145 non-consenters)
